# Supplementary material
Source: PubMed Central journal article supplement (PMC3176021)
Supplement: 10-6579_z7g999111928sf01.pdf [file 10-6579_z7g999111928sf01.pdf]

## Figure S1

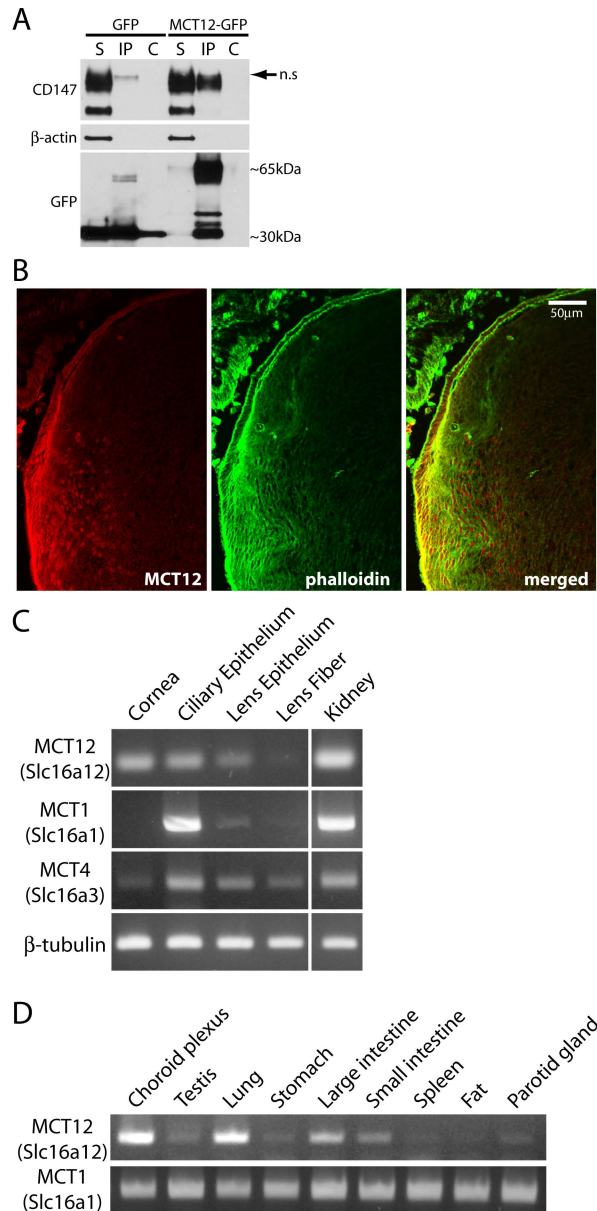

**Figure S1.** Confirmation of MCT12-CD147 interaction and *Slc16a12* mRNA expression in rat tissues. **(A)** To confirm the interaction of MCT12-GFP with CD147, the reverse IP of Figure 2C was performed with lysates being precipitated with anti-GFP antibody. n.s.= nonspecific band arising from the secondary blotting antibody detecting the precipitating anti-GFP antibody that is present in the samples; this is present in both the GFP and MCT12-GFP samples, but somewhat masked by the CD147 band in the MCT12-GFP sample. **(B)** Low magnification image of a P1 mouse lens showing high level of expression of MCT12 (red) in the equatorial epithelium and differentiating secondary fiber cells with phalloidin counterstain (green). **(C)** Eyes from 4 month old rats were microdissected to obtain cornea, ciliary epithelium, lens epithelium, and lens fiber tissue from which RNA was extracted and cDNA was prepared. PCR for *Slc16a* family members was performed on these tissues with kidney as a positive control and  $\beta$ -tubulin was used as a loading control. **(D)** In order to determine the tissue distribution of *Slc16a12* mRNA expression, cDNA was prepared from the mRNA of an array of tissues from *Slc16a12*<sup>WT</sup> rats and PCR was performed with primers specific for *Slc16a12* and *Slc16a1* mRNA.
