# Supplementary material
Source: PubMed Central journal article supplement (PMC3176021)
Supplement: 10-6579_z7g999111928sf02.pdf [file 10-6579_z7g999111928sf02.pdf]

## Figure S2

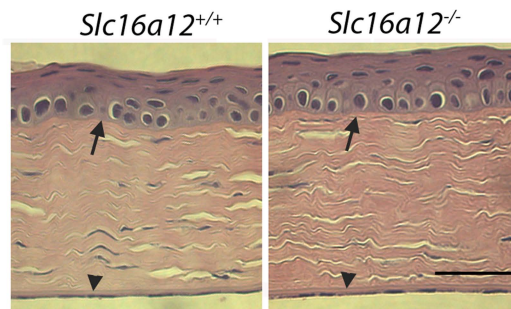

**Figure S2.** Corneas from *Slc16a12*<sup>TKO</sup> rats are normal. Hematoxylin and eosin stained sections of the corneas of eyes from *Slc16a12*<sup>WT</sup> or *Slc16a12*<sup>TKO</sup> rats, arrow indicates corneal epithelium and arrow head indicates corneal endothelium. Bar = 50 μm.
